# Supplementary material
Source: MDPI journal article supplement (https://www.mdpi.com/1424-8247/16/11/1598)
Supplement: s1 [file s1]

## Supplementary data

### Title

### A *Camellia sinensis* aqueous extract: a promising therapeutic candidate on hepatic Eimeriosis in Rabbits

**Figure S1.** Liquid Chromatography Mass Spectrometry (LC-MS) analysis of green tea.

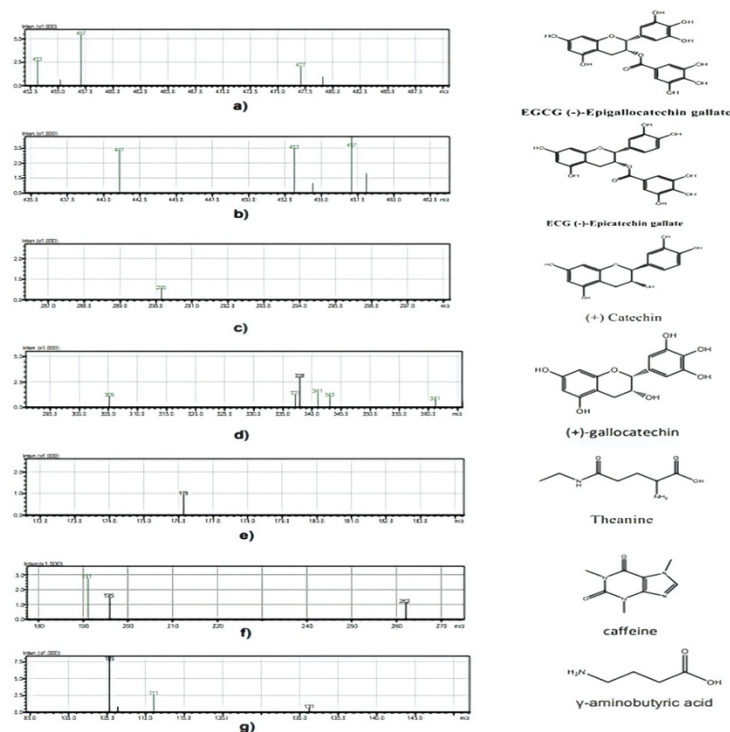

**Figure S2.** FT-IR of Green Tea extract using a Fourier Transform infrared spectrophotometer. FTIR absorbance was measured using a Fourier Transform infrared spectrophotometer (IR-SPIRIL-T), A22415801447AE, Shimadzu with a Smart ATR sampling accessory. The FTIR scanning was performed from 4000  $\text{cm}^{-1}$  to 400  $\text{cm}^{-1}$ ; the number of scans was 24. The characteristic bands by FT-IR are as follows; In green tea IR spectrum, at 3340  $\text{cm}^{-1}$  band stretching vibration of O-H groups and N-H for water, alcohol phenols, and amines. The C-H stretch at 2920 and O-H stretch at 2858  $\text{cm}^{-1}$  for alkanes and carboxylic acid respectively. The band at 1729  $\text{cm}^{-1}$  C=O Stretch of aromatic ring & band at 1638  $\text{cm}^{-1}$  in polyphenols. For the amide in protein, the C-N stretch gives the band at 1371  $\text{cm}^{-1}$ . The C-O-C stretching in polysaccharides gives a band at 1729  $\text{cm}^{-1}$  and C-O stretching in amino acids causes a band at

1020  $\text{cm}^{-1}$ . band at 832  $\text{cm}^{-1}$  of C–H plane bending. the IR spectrum of green tea observed that rich in polysaccharides, polyphenols, carboxylic acids, amino acids, and proteins.

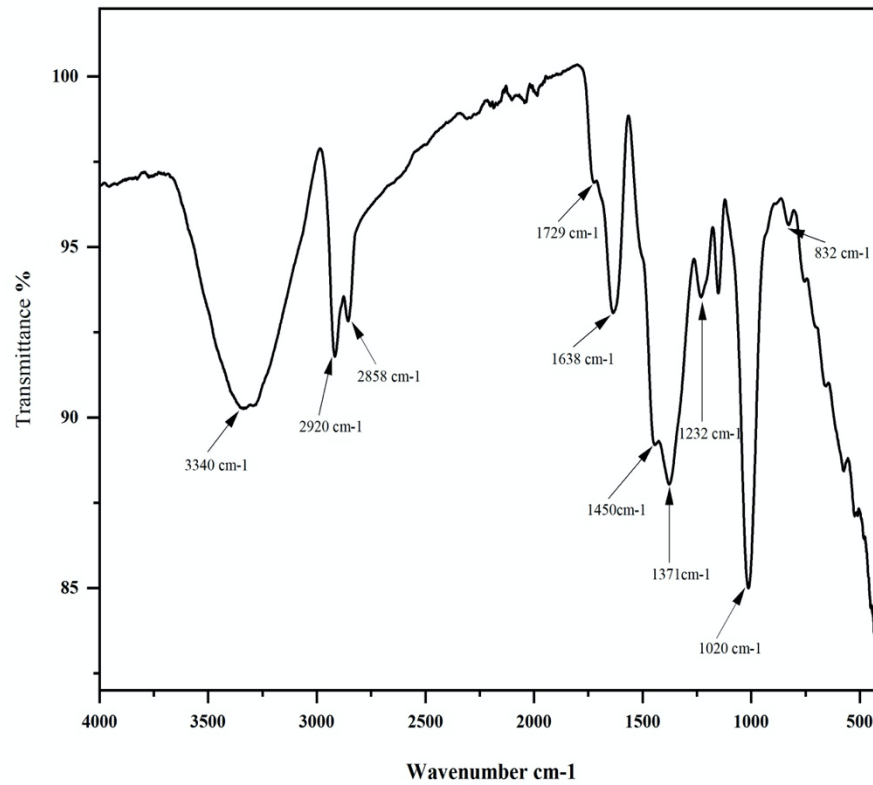

**Figure S3.** Fluorescence microscopic image of Oocyst and sporulated oocyst of *Eimeria stiedae*. Bio-Rad ZOE Fluorescent Cell Imager is used.

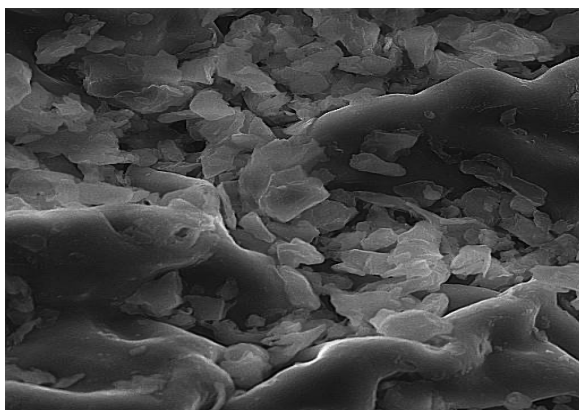

**Figure S4.** Scanning Electron Microscopic image of green tea extraction.

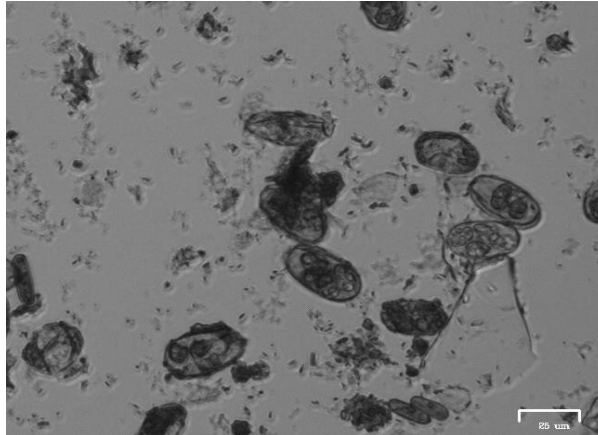

**Supplementary Table S1 .**Rabbits grouping for the experiment design.

| Rabbit groups No. | Group name                               |
|-------------------|------------------------------------------|
| G1                | Non-infected untreated (-ve control)     |
| G2                | Non-infected and treated with 250 mg GTE |
| G3                | Non-infected and treated with 500 mg GTE |
| G4                | Infected and untreated (+ve control)     |
| G5                | Infected and treated with 250 mg GTE     |
| G6                | Infected and treated with 500 mg GTE     |
